# Supplementary material for: “Domains of Deprivation Framework” for Mapping Slums, Informal Settlements, and Other Deprived Areas in LMICs to Improve Urban Planning and Policy: A Scoping Review
Source: Preprints.org preprint supplement (doi:10.20944/preprints202102.0242.v1), 2021-02-09
Supplement: Supplementary file 1 [file supplementary]

## Sheet: AppendixB
Source	Surname	Year	Title	Coverage			Domains	Diagram	Open indicator data	Composite output	Framework applied	If applied, using data from...				If applied, GIS map at neighborhood level
				Region	Single / multi-country	UNDP-2018						Engagements	Census	Survey	Earth Observation
Scopus	Abarca-Alvarez et al.	2019	Decision Model for Predicting Social Vulnerability Using Artificial Intelligence	Europe & Central Asia	Single	Developed	Human capital - Demographic characteristics; Human capital - Social and economics characteristics; Social capital - Community development; Public resource provision and public security	No	Unclear	No	Yes	No	Yes	Yes	No	No
Scopus	Ajakaiye et al.	2014	Multidimensional poverty in Nigeria: First order dominance approach	Sub-Saharan Africa	Single	Developing	Education; Water; Sanitation; Shelter; Energy	No	Yes	Yes	Yes	No	No	No	No	No
Scopus	Ajami et al.	2019	Identifying a Slums’ Degree of Deprivation from VHR Images Using Convolutional Neural Networks	East & South Asia	Single	Developing	Human; Social; Financial; Physical; Contextutal; Earth Observation	Yes	Yes	Yes	Yes	No	No	Yes	Yes	Yes
Scopus	Akter and Rahman	2016	Investigating Multiple Domains of Household Livelihood Security: Insights from Urban Slums in Bangladesh	East & South Asia	Single	Least developed	Economic; Food; Health; Education; Empowerment	Yes	Unclear	No	Yes	Yes	No	Yes	No	No
Other	Alguacil and Camacho	2013	The urban vulnerability in Spain. Identification and evolution of the vulnerable neighborhoods	Europe & Central Asia	Single	Developed	Demographic; Socio-economic; Residential; Subjective	No	Yes	No	Yes	No	Yes	No	No	No
Snowball	Alkire and Santos	2010	Acute Multidimensional Poverty: A New Index for Developing Countries	Global South	Multiple	Developing	Education; Health; Standard of Living	No	Unclear	Yes	Yes	No	Yes	Yes	No	No
Scopus	Alves	2013	Analysis of socio-environmental vulnerability in Cubatão, SP, Brazil, through the integration of socio-demographic and environmental data at the intra-urban scale	Central & South America	Single	Developing	Exposure to environmental risk, Susceptibility / poverty	No	Yes	Yes	Yes	No	Yes	No	No	No
Scopus	Anindito et al.	2018	Modelling the Kampungkota: A quantitative approach in defining Indonesian informal settlements	Global	Single	N/A	None	No	Unclear	Yes	No	NA	NA	NA	NA	NA
Scopus	Arribas-Bel et al.	2017	Remote sensing-based measurement of Living Environment Deprivation: Improving classical approaches with machine learning	Europe & Central Asia	Single	Developed	Land cover features; Spectral features; Texture features; Structure features	No	Yes	Yes	Yes	No	No	No	Yes	No
Scopus	Asadi-Lari et al.	2013	Response-oriented measuring inequalities in Tehran: second round of Urban Health Equity Assessment and Response Tool (Urban HEART-2) concepts and framework	Middle East & North Africa	Single	Developing	Physical and infrastructure; Human and social development; Health; Economic development; Governance; Cultural	No	Unclear	No	Yes	Yes	No	Yes	No	No
Scopus	Bag	2018	Does It Matter How We Assess Standard of Living? Evidence from Indian Slums Comparing Monetary and Multidimensional Approaches	East & South Asia	Single	Developing	Water; Sanitation; Type of house; Leakage in house; Crowding; Respiratory health risk; Health insurance; Savings; Assets; Information; Education	No	Yes	Yes	Yes	No	No	Yes	No	No
Other	Barnes et al.	2007	The South African Index of Multiple Deprivation for Children	Sub-Saharan Africa	Single	Developing	Income and material; Employment; Education; Adequate care; Living environment	Yes	Yes	Yes	Yes	Yes	Yes	No	No	No
Snowball	Baud et a.	2008	Mapping urban poverty for local governance in an Indian mega-city: The case of Delhi	East & South Asia	Single	Developing	Social Capital; Human Capital; Financial Capital; Physical Capital	Yes	Yes	Yes	Yes	No	Yes	No	No	No
Other	Baud et al.	2009	Matching deprivation mapping to urban governance in three Indian mega-cities	East & South Asia	Single	Developing	Social Capital; Human Capital; Financial Capital; Physical Capital	Yes	Yes	Yes	Yes	No	Yes	No	No	No
Snowball	Baum	2006	A Typology of Socio-Economic Advantage and Disadvantage in Australia's Large Non-Metropolitan Cities Towns and Regions	Oceania	Single	Developed	Income advantaged mining-based cities, towns and regions; Tourism/population boom advantaged cities, towns and regions; Advantaged service-based cities, towns and regions; Agriculture-based disadvantaged cities, towns and regions; Old economy employment disadvantaged cities, towns and regions; Welfare/retirement migration disadvantaged cities, towns and regions	Yes	Yes	Yes	Yes	Yes	No	Yes	No	No
Scopus	Bayram et al.	2010	Social Exclusion and Quality of Life: An Empirical Study from Turkey	Europe & Central Asia	Single	Developing	Material deprivation; Social rights; Social participation; Cultural intergration	No	Unclear	Yes	Yes	Yes	No	Yes	No	No
Snowball	Bell et al.	2007	Using GIS-based methods of multicriteria analysis to construct socio-economic deprivation indices	North America	Single	Developed	Income variables; Housing variables; Demographic variables; Mobility variables; Education variables; Employment variables	No	Yes	Yes	Yes	Yes	Yes	Yes	No	No
Scopus	Bérenger	2017	Using ordinal variables to measure multidimensional poverty in Egypt and Jordan	Middle East & North Africa	Multiple	Developing	Education; Heath; Standard of Living	No	Yes	Yes	Yes	No	No	Yes	No	No
Scopus	Bocquier et al.	2007	Small area analysis of social inequalities in residential exposure to road traffic in Marseille	Europe & Central Asia	Single	Developed	Socio-economic	No	Unclear	Yes	Yes	No	Yes	No	No	Yes
Scopus	Borzooie et al.	2019	Designing Urban Customs and Border Marketplaces: A Model and Case Study From Lotfabad, Iran	Middle East & North Africa	Single	Developing	Procedural; Substantive	No	Unclear	No	No	NA	NA	NA	NA	NA
Snowball	Bradshaw	2003	Overlaps in Dimensions of Poverty	Europe & Central Asia	Single	Developed	Deprivation; Subjective poverty; Income poverty	No	Unclear	No	Yes	No	Yes	Yes	No	No
Scopus	Builes-Jaramillo	2020	Closeness matters. Spatial autocorrelation and relationship between socioeconomic indices and distance to departmental Colombian capitals	Central & South America	Single	Developing	Education; Childhood and youth; Work and employment; Health; Utilities and housing conditions	No	Unclear	No	Yes	No	Yes	No	No	No
Scopus	Caicedo and Jones	2014	Investigating neighbourhood effects on health: using community-survey data for developing neighbourhood related constructs	Central & South America	Single	Developing	Female head of household; Education; Employment; Home ownership; Years living in the neighbourhood	No	Unclear	Yes	Yes	Yes	No	No	No	Yes
Scopus	Casas et al.	2009	A comparison of three methods for identifying transport-based exclusion	North America	Single	Developed	Income; Employment; Disability; Education; Geographic access; Housing	No	Unclear	Yes	Yes	Yes	Yes	Yes	No	No
Scopus	Chen et al.	2014	Determinants of Poverty Status in Taiwan: A Multilevel Approach	East & South Asia	Single	Developing	Family - Educational attainment; Family - Socioeconomic status; Family - Dependency ratio; Family - Marital status; Regional - Income inequality; Regional - Employment to population ratio; Regional - Service to manufacturing ratio; Regional - Spatial mismatch	No	Yes	No	Yes	Yes	Yes	Yes	Yes	No
Scopus	Chen et al.	2019	Measurement and Determinants of Multidimensional Poverty: Evidence from Taiwan	East & South Asia	Single	Developing	Education; Medical care; Environment; Health; Employment	No	Unclear	Yes	Yes	No	No	No	No	No
Scopus	Chowdhury and Mukhopadhaya	2015	Functioning Achievements in Urban Bangladesh: A Comparison with Rural Areas	East & South Asia	Single	Least developed	Core need fulfilment; Asset building; Human capacity building; Access to general information; Access to government information; Freedom	No	Yes	Yes	Yes	Yes	No	Yes	No	No
Snowball	Consejo Nacional de Evaluación de la Política de Desarrollo Social (CONEVAL)	2010	Methodology for Multidimensional Poverty Measurement in Mexico	North America	Single	Developing	Wellbeing (economic welfare); Social derpivation index (social rights)	No	Unclear	Yes	No	NA	NA	NA	NA	NA
Scopus	Cornado et al.	2017	Methodology for the Detection of Residential Vulnerable Areas - The Case of Barcelona	Europe & Central Asia	Single	Developed	Socio-economic; Socio-spatial; Urban; Spacio-urban	No	Yes		Yes	No	Yes	No	No	No
Other	Coromaldi and Zoli	2011	Deriving Multidimensional Poverty Indicators: Methodological Issues and an Empirical Analysis for Italy	Europe & Central Asia	Single	Developed	Maintenance capacity; Consumption deprivation; Health status; Housing facilities; Other housing related problems	Yes	Yes	Yes	Yes	Yes	No	Yes	No	No
Scopus	D'ambrosio	2008	Deprivation in Sao Paolo Districts: Evidence from 2000	Central & South America	Single	Developing	Absolute Gini inefficient; Polarisation index of Estaban and Ray (1994); Deprivation measure of Bossert et al (2007)	No	Unclear	Yes	Yes	No	Yes	Yes	No	Yes
Snowball	Davis	2003	Choosing a method for poverty mapping	Global	Multiple	N/A	Economic; Social; Demgraphic; Vulnerability	No	Unclear	No	No	NA	NA	NA	NA	NA
Scopus	Deinne	2019	A socio-spatial perspective of multi-dimensional poverty in Delta state, Nigeria	Sub-Saharan Africa	Single	Developing	Deprivation headcount index of the global multi-dimensional poverty (MPI); Education; Health and living standard	Yes	Unclear	Yes	Yes	No	No	Yes	No	No
Scopus	Duclos et al.	2006	Robust Multidimensional Spatial Poverty Comparisons in Ghana, Madagascar, and Uganda	Sub-Saharan Africa	Multiple	Developing	Household expenditure per capita; Children’s standardized height	No	Unclear	No	Yes	Yes	No	Yes	No	No
Scopus	Ensor et al.	2020	From Rags to Riches: Assessing poverty and vulnerability in urban Nepal	East & South Asia	Single	Least developed	Current resources; Physical capital; Physical and human capital; Self-defined	No	Unclear	Yes	Yes	Yes	No	Yes	No	No
Snowball	Eroǧlu	2007	Developing and Indes of Deprivation which Integrates Objective and Subjective Dimensions: Extending the Work of Townsend, Mack and Lansley, and Hallerod	Europe & Central Asia	Single	Developing	Monetary; Consumption; Work	No	No	Yes	Yes	Yes	No	Yes	No	No
Snowball	Eurostat European Commission	2010	Combating poverty and social exclusion 2010 edition: A statistical portrait of the European Union 2010	Europe & Central Asia	Multiple	Developed	Lack of durables; Economic strain	No	Unclear	Yes	Yes	Yes	Yes	Yes	No	Yes
Other	Exeter et al.	2017	The New Zealand Indices of Multiple Deprivation (IMD): A new suite of indicators for social and health research in Aotearoa, New Zealand	Oceania	Single	Developed	Employment; Income; Crime; Housing; Health; Education; Geographical Access	Yes	Yes	No	Yes	Yes	Yes	No	No	No
Snowball	Feres and Mancero	2001	The method of unsatisfied basic needs (UBN) and its applications in Latin America	Central & South America	Multiple	Developing	Access to housing; Access to health services; Access to education; Economic capacity	No	Yes	Yes	No	NA	NA	NA	NA	NA
Scopus	Fuentes et al.	2018	Multidimensional Poverty Measurement at the Intra-Urban Level in Ciudad Juárez, Chihuahua, 2012	North America	Single	Developing	Poverty; Social Deprivation; Indicators of social deprivation; Wellbeing	No	Unclear	Yes	Yes	No	Yes	Yes	No	No
Other	Fukuda et al.	2006	Higher mortality in areas of lower socioeconomic position measured by a single index of deprivation in Japan	East & South Asia	Single	Developed	Unemployment; Overcrowding; Low social class and poverty; Education; Home ownership; Income; Vulnerable group	No	Yes	Yes	Yes	Yes	Yes	Yes	Yes	No
Scopus	Gao and Sun	2020	Poverty Measure Based on Hesitant Fuzzy Decision Algorithm under Social Network Media	East & South Asia	Single	Developing	Economic situation; Educational level; Environment; Health; Asset status	No	Unclear	Yes	Yes	No	No	Yes	No	No
Scopus	Ge et al.	2017	A new framework for understanding urban social vulnerability from a network perspective	East & South Asia	Single	Developing	SVI of nodes in the network (Attribute data of social vulnerability); Connectivity of SVI in the network (Relational data of social vulnerability)	Yes	Unclear	Yes	Yes	No	Yes	No	No	No
Other	Guillaume et al.	2015	Development of a cross-cultural deprivation index in five European countries	Europe & Central Asia	Multiple	Developed	Social exclusion; Household data; Basic amenities of housing; Home ownership; Car; Marital status; Year of birth/sex; Employment status; Education level; Occupation	No	Yes	No	Yes	Yes	Yes	Yes	No	No
Scopus	Gunther	2008	Estimating Households Vulnerability to diosyncratic and Covariate Shocks: a novel method applied in Madagascar	Sub-Saharan Africa	Single	Least developed	Household; Community	No	Unclear	Yes	Yes	No	Yes	Yes	No	No
Scopus	Hacker et al.	2013	Urban slum structure: intergrating socioeconomic and land cover data to model slum evolution in Salvador in Brazil	Central & South America	Single	Developing	Income; Education; Infrastructure	Yes	Unclear	Yes	Yes	No	Yes	No	Yes	Yes
Scopus	Harris and Longley	2004	Targeting Clusters of Deprivation within Cities	Europe & Central Asia	Single	Developed	Poverty; Inequality; Social Exclusion	No	Unclear	No	Yes	Yes	Yes	No	Yes	Yes
Snowball	Havard et al.	2008	A small-area index of socioeconomic deprivation to capture health inequalities in France	Europe & Central Asia	Single	Developed	Income; Job; Housing; Family and household; Educational level; Immigration status	No	Unclear	Yes	Yes	No	Yes	No	No	No
Scopus	Hulse et al.	2014	Disadvantaged places in urban Australia: analysing socioeconomic diversity an housing market performance	Oceania	Single	Developed	Social/residential mobility; Lifecycle stage/family type; Change over time in economic status	No	Unclear	Yes	Yes	No	Yes	Yes	No	Yes
Snowball	Jarman	2001	Explaining social exclusion: A Theoretical Model Testing in the Netherlands	Europe & Central Asia	Single	Developed	Material deprivation; Social Rights - access to institutions and provisions; Social Rights - access to adequate housing and safe environment; Social participation; Cultural/normative integration	Yes	No	Yes	Yes	No	Yes	Yes	No	No
Snowball	Jarman, Brian	1983	Identification of unprivileged areas	Europe & Central Asia	Single	Developed	Social factors; Service factors	No	No	Yes	Yes	No	Yes	Yes	No	No
Scopus	Jenerette	2018	Ecological contributions to human health in cities	North America	Single	Developed	Ecological indicators	No	Unclear	No	Yes	No	No	Yes	Yes	No
Scopus	Johnson	2007	A Re-count of Poverty in US Central Cities: Just Who and Where Are the Urban Poor?	North America	Single	Developed	Income	No	Unclear	No	Yes	Yes	Yes	Yes	No	No
Other	Jordan et al.	2004	The Index of Multiple Deprivation 2000 and accessibility effects on health	Europe & Central Asia	Single	Developed	Income; Employment; Health deprivation and disability; Education, skills and training; Housing; Geographical access to services	No	Yes	Yes	Yes	Yes	Yes	No	No	No
Other	Kearns et al.	2000	Area Deprivation in Scotland: A New Assessment	Europe & Central Asia	Single	Developed	Housing; Health; Education; Crime/environment; Labour market; Poverty	No	Yes	Yes	Yes	Yes	Yes	Yes	No	Yes
Snowball	Kohli et al.	2012	Generic Slum Ontology	Global South	Multiple	Developing	Environs; Settlement; Object	Yes	Yes	No	Yes	Yes	No	No	Yes	Yes
Snowball	Krishnan	2015	Development of a Multidimensional Living Conditions Index (LCI)	North America	Single	Developed	Demography/family structure; Economy/economic diversity; Gender equality; Housing; Education; Ethnicity/cultural diversity; Density/infrastructure	No	Unclear	Yes	Yes	No	Yes	No	No	No
Scopus	Ling	2007	Do the Chinese "Keep up with the Jones"? Implications of peer effects, growing economic disparities and relative deprivation on health outcomes among older adults in china	East & South Asia	Single	Developing	Income; Relative deprivation	No	Unclear	Yes	Yes	No	No	Yes	No	No
Other	Lynne C. Messer., et al	2006	The Development of a Standardized Neighborhood Deprivation Index	North America	Single	Developed	Income/poverty; Education; Employment; Housing; Occupation	No	Yes	Yes	Yes	Yes	Yes	No	No	No
Scopus	Mahadevan et al.	2016	The nexus between poverty and deprivation in Vietnam	East & South Asia	Single	Developing	Food security; Income; Housing; Toilet; Waste disposal	No	Yes	Yes	Yes	Yes	No	Yes	No	No
Scopus	Manap et al.	2017	Investigation of Poverty Indicators for designing Case Representation to determine Urban Poverty	East & South Asia	Single	Developing	Poverty	No	Unclear	No	Yes	Yes	No	Yes	No	No
Scopus	Mari-dell'olmo et al.	2011	Bayesian Factor Analysis to calculate a deprivation index and its uncertainty	Europe & Central Asia	Single	Developed	Temporary workers; Insufficient education; Proportion of young people with insufficient education	No	Unclear	Yes	Yes	No	Yes	No	No	Yes
Scopus	Martínez and Lechuga	2012	Evolution of the factor’s risk to the exclusion for regions in Spain	Europe & Central Asia	Single	Developed	Economic; Working; Educational; Household; Ambiental; Health	No	Yes	No	Yes	No	No	Yes	No	No
Other	McLennan et al	2019	The English Indices of Deprivation 2019	Europe & Central Asia	Single	Developed	Income; Employment; Education, skills and training; Health and disability; Crime; Barriers to housing and services; Living environment	No	Yes	Yes	Yes	Yes	Yes	Yes	No	No
Snowball	Messer et al.	2006	The Development of a Standardized Neighborhood Deprivation Index	North America	Single	Developed	Poverty; occupation; housing; employment; education	No	Yes	Yes	Yes	No	Yes	No	No	No
Snowball	Ministerio de Fomento	2011	Atlas of Urban Vulnerability	Europe & Central Asia	Single	Developed	Socio-demographic vulnerability; Socio-economic vulnerability; Residential vulnerability; Subjetive vulnerability	Yes	Yes	Yes	Yes	No	Yes	No	No	No
Scopus	Mitra et al.	2018	City size, deprivation and other indicators of development: Evidence from India	East & South Asia	Single	Developing	None	No	Unclear		Yes	No	Yes	No	No	No
Scopus	Montoya et al.	2016	Multidimensional Poverty in Nicaragua: Are Female-Headed Households Better Off?	Central & South America	Single	Developing	Education; Heath; Standard of Living	Yes	Yes	Yes	Yes	No	Yes	Yes	No	No
Snowball	Moser	1998	The asset vulnerability framework: reassessing urban poverty reduction strategies	Global	Multiple	N/A	Physical capital; Financial capital; Human capital: Includes Social capital & Natural capital	No	No	Yes	No	NA	NA	NA	NA	NA
Snowball	Mpenya et al.	2020	Mapping Out Non-monetary Dimensions of Well-Being by Ethnicity in Rural Cameroon	Sub-Saharan Africa	Single	Developing	Physical; Human; Financial/productive	No	Unclear	Yes	Yes	No	No	Yes	No	No
Scopus	Najjary et al.	2016	Identification of deprivation degrees using two models of fuzzy-clustering and fuzzy logic based on regional indices: A case study of Fars province	Middle East & North Africa	Single	Developing	Educational; Cultural; Welfare; Health; Economical; Transportation; Housing; Service	No	Yes	Yes	Yes	Yes	No	No	No	No
Other	Niggebrugge et al.	2004	The index of multiple deprivation 2000 access domain: a useful indicator for public health?	Europe & Central Asia	Single	Developed	Access	No	Yes	No	Yes	Yes	Yes	No	No	No
Other	Noble et al.	2006	Measuring multiple deprivation at the small-area level	Europe & Central Asia	Single	Developed	Housing; Income; Employment; Education; Geographical access to services	No	Unclear	Yes	Yes	Yes	Yes	No	No	No
Other	Noble et al.	2009	The South African Index of Multiple Deprivation 2001 at Datazone Level	Sub-Saharan Africa	Single	Developing	Income and Material; Employment; Health; Education; Living Environment	No	Yes	Yes	Yes	Yes	Yes	No	Yes	No
Other	Noble et al.	2009	Small Area Indices of Multiple Deprivation in South Africa (SAIMD)	Sub-Saharan Africa	Single	Developing	Income and Material; Employment; Health; Education; Living Environment	No	Yes	Yes	Yes	Yes	Yes	No	No	No
Other	Noble et al.	2011	Multiple Deprivation and Income Poverty at Small Area Level in South Africa in 2011	Sub-Saharan Africa	Single	Developing	Material; Employment; Education; Living environment	No	Yes	No	Yes	Yes	Yes	No	No	No
Other	Noble et al.	2012	Using Indicators of Multiple Deprivation to Demonstrate the Spatial Legacy of Apartheid in South Africa	Sub-Saharan Africa	Single	Developing	Income; Employment; Education; Living Environment; Health	No	Yes	Yes	Yes	Yes	Yes	No	No	No
Snowball	Office of the Chief Statistician	2004	Scottish Index of Multiple Deprivation (SIMD) 2004 Technical Report	Europe & Central Asia	Single	Developed	Current Income; Employment; Housing; Health; Education, Skills and Training; Geographic Access and Telecommunications	No	Yes	Yes	Yes	Yes	Yes	No	No	No
Other	Office of the Chief Statistician	2006	Scottish Index of Multiple Deprivation 2006 Technical Report	Europe & Central Asia	Single	Developed	Current Income; Employment; Health; Education; Geographic Access; Housing; SIMD crime	No	Yes	Yes	Yes	Yes	Yes	No	No	No
Scopus	Oldewage et al.	2008	Impact of Food and nutrition invententions on poverty in an informal settlement in the Vaal region, South Africa	Sub-Saharan Africa	Single	Developing	Poverty; Malnutrition; Food insecurity	No	Unclear	Yes	Yes	Yes	Yes	Yes	No	No
Other	Ompad et al.	2007	Social determinants of the health of urban populations: Methodologic considerations	Global	Multiple	N/A	Social determinants of health	No	No	No	No	NA	NA	NA	NA	NA
Scopus	Page et al.	2019	Measuring Spatial Accessibility to Services within Indices of Multiple Deprivation: Implications of Applying an Enhanced two-Step Floating Catchment Area (E2SFCA) Approach	Europe & Central Asia	Single	Developed	Income; Employment; Health; Education; Access to services; Community safety; Physical environment; Housing	No	Yes	Yes	Yes	No	Yes	No	No	No
Scopus	Pairan et al.	2018	Poverty standardized factor loading in province of Bali island	East & South Asia	Single	Developing	Economy; Social; Mental; Cultural; Political	Yes	No	Yes	Yes	No	No	Yes	No	No
Scopus	Panori et al.	2019	Designing the Ontology of a Smart City Application for Measuring Multidimensional Urban Poverty	Europe & Central Asia	Single	Developed	Health; Education; Standard of Living	Yes	Unclear	Yes	Yes	Yes	No	Yes	No	No
Snowball	Pawson et al.	2012	Addressing concentrations of disadvantage: policy, practice and literature review	Oceania	Single	Developed	Social-interactive mechanisms; Environmental mechanisms; Geographical mechanisms; Institutional mechanisms	No	Unclear	No	No	NA	NA	NA	NA	NA
Other	Payne and Abel	2012	UK indices of multiple deprivation – A way to make comparisons across constituent countries easier	Europe & Central Asia	Single	Developed	Income; Employment	No	Yes	No	Yes	Yes	Yes	No	No	No
Scopus	Perez et al.	2019	La vulnerabilidad social en Ciudad Juárez, Chihuahua, México. Herramientas para el diseño de una política social	North America	Single	Developing	Social vulnerability; Household vulnerability	No	Yes	Yes	Yes	No	Yes	No	No	No
Scopus	Reckien	2018	What is in an index? Construction method, data metric, and weighting scheme determine the outcome of composite social vulnerability indices in New York City	North America	Single	Developed	Social	No	Yes	Yes	Yes	No	Yes	Yes	No	No
Scopus	Rojas et al.	2008	Rethinking in a holistic way the risk to health caused by precarious urban dwellings: an analysis from sociodemographic vulnerability approach	Central & South America	Single	Developing	Human capital; Social capital; Physical capital	No	Yes	No	No	NA	NA	NA	NA	NA
Scopus	Roy et al.	2020	An exploratory factor analysis model for slum severity index in Mexico City	North America	Single	Developing	Sanitation; Water; Structural; Overcrowding	No	Unclear	Yes	Yes	No	Yes	No	Yes	No
Scopus	Saif-Ur-Rahman et al.	2018	Use of indices to measure socio-economic status (SES) in South-Asian urban health studies: A scoping review	East & South Asia	Multiple	Multiple	Assets; Assets and education; Income and expenditure; Education and occupation; Other	No	No	No	No	NA	NA	NA	NA	NA
Snowball	Saunders et al.	2007	Towards New Indicators of Disadvantage: Deprivation and Social Exclusion in Australia	Oceania	Single	Developed	Accommodation and housing; Location and transport; Health and health care; Social and community participation; Care and support; Employment, education and skills	Yes	Unclear	Yes	Yes	Yes	No	Yes	No	No
Scopus	Seguel and Villaroel	2018	Evaluation of gaps in urban infrastructure in neighborhoods in Viña del Mar, Chile: A methodology for the identification of urban deserts	Central & South America	Single	Developing	Accessibility to urban facilities	Yes	Unclear	Yes	Yes	No	No	Yes	No	Yes
Scopus	Smith et al.	2013	Finger On The Pulse: Identifying Deprivation Using Transit Flow Analyis	Europe & Central Asia	Single	Developed	Income; Employment; Health; Housing; Crime; Living environment; Education	No	Yes	Yes	Yes	Yes	Yes	Yes	No	No
Snowball	Smith, et al.	2015	The English Indices of Deprivation 2015	Europe & Central Asia	Single	Developed	Income deprivation; Employment deprivation; Education, skills and training deprivation; Health deprivation and disability; Crime; Barriers to housing and services; Living environment deprivation	No	Yes	No	Yes	Yes	Yes	Yes	Yes	No
Other	Sondos	2009	Socio-Economic Deprivation Indices (Case Study: Jordan)	Middle East & North Africa	Single	Developing	Income; Employment; Housing; Education; Health; Access to services; Environment	No	Yes	Yes	Yes	Yes	No	Yes	No	No
Snowball	Sphere Project	2011	Humanitarian Charter and Minimum Standards in Humanitarian Response	Global	Multiple	N/A	Water supply, sanitation and hygiene promotion (WASH); Food security and nutrition; Shelter and settlement; Health	Yes	Unclear	No	No	NA	NA	NA	NA	NA
Scopus	Steinert et al.	2016	One Size Fits All? The Validity of a Composite Poverty Index Across Urban and Rural Households in South Africa	Sub-Saharan Africa	Single	Developing	Housing; Assets; Human Capital	No	Unclear	Yes	Yes	No	Yes	Yes	No	No
Scopus	Swiader et al.	2017	Poverty Risk Index as A New Methodology for Social Inequality Distribution Assessment	Europe & Central Asia	Single	Developed	None	No	Yes	Yes	Yes	No	Yes	No	No	No
Scopus	Taubenböck et al.	2018	The morphology of the Arrival City - A global categorization based on literature surveys and remotely sensed data	Global South	Multiple	Developing	Building level; Block level	Yes	No	Yes	Yes	No	No	No	Yes	Yes
Other	Thompson	2005	Entrpreneurship and Domains of Deprivation in Wales	Europe & Central Asia	Single	Developed	Income; Employment; Health and disability; Education, skills and training; Housing; Physical environment; Geographical access to services	No	Yes	No	Yes	Yes	No	Yes	No	No
Scopus	Tipayamongkholgul et al.	2013	Spatial analysis of social determinants for tuberculosis in thailand	East & South Asia	Single	Developing	Population density; Poverty rate; Income; Unemployment; HIV/AIDS prevalence	No	Unclear	Yes	Yes	No	Yes	Yes	No	No
Snowball	UNDP	2009	Human Development Report 2009	Global	Multiple	N/A	Longevity/health; Knowledge; Standard of living	No	Unclear	Yes	Yes	No	Yes	Yes	No	No
Other	United Nations	2003	The challenge of slums	Global	Multiple	N/A	Access to water; Access to sanitation; Structural quality of housing; Overcrowding; Security of tenure	No	Unclear	No	No	NA	NA	NA	NA	NA
Snowball	United Nations Development Programme (UNDP)	2020	Charting pathways out of multidimensional poverty: Achieving the SDGs	Global	Multiple	N/A	Health; Education; Standard of living	Yes	Unclear	Yes	Yes	No	Yes	Yes	No	No
Scopus	Venerandi et al.	2018	A scalable method to quantify the relationship between urban form and socio-economic indexes	Europe & Central Asia	Single	Developed	Urban form; Socio-economic	No	Yes	No	No	NA	NA	NA	NA	NA
Scopus	Wan and Su	2017	China's social deprivation: Measurement, spatiotemporal pattern and urban applications	East & South Asia	Single	Developing	Socioeconomic; Disadvantaged; Education; Housing; Occupation	Yes	Yes	Yes	Yes	No	Yes	No	No	No
Scopus	Wang and Fox	2016	Households, The Homeless and Slums Towards a Standard for Representing City Shelter Open Data	North America	Single	Developed	Shelter	Yes	Yes	No	No	NA	NA	NA	NA	NA
Scopus	Webster et al.	2015	Informality, property rights, and poverty in China’s ‘‘favelas”	East & South Asia	Single	Developing	Measures of income; Household food consumption; Savings; Degree of dwelling level overcrowding; Access to basic household amenities; Housing expenditures to total expenditure	No	Yes	No	Yes	Yes	No	Yes	No	No
Snowball	WHO	1997	WHOQOL: Programme on Mental Health Division	Global	Multiple	N/A	Physical health; Psychological; Level of Independence; Social relationships; Environment; Spirituality/Religion/Personal beliefs	No	Unclear	Yes	No	NA	NA	NA	NA	NA
Other	Wilkinson et al.	2020	Local response in health emergencies: key considerations for addressing the COVID-19 pandemic in informal urban settlements	Global South	Multiple	Developing	Epidemiological vulnerability; Transmission vulnerability; Health system vulnerability; Direct vulnerability to control measures; Systematic vulnerability	No	Yes	No	No	NA	NA	NA	NA	NA
Snowball	Yakubu et al.	2014	Multidimensional Poverty Analysis and Informal Sector in Nigeria	Sub-Saharan Africa	Single	Developing	Health; Education; Standard of Living	No	No	Yes	Yes	No	No	Yes	No	No
Scopus	Yichao and Di	2017	A gender-based analysis of multidimensional poverty in China	East & South Asia	Single	Developing	Education; Health; Nutrition; Income; Housing	No	Yes	No	Yes	Yes	No	Yes	No	Yes
Scopus	Yuan et al.	2018	Exploring urban-rural disparity of the multiple deprivation index in Guangzhou City from 2000 to 2010	East & South Asia	Single	Developing	Income; Job opportunities; Education; Housing conditions	No	Yes	Yes	No	NA	NA	NA	NA	NA
Scopus	Zakaria et al	2017	Clustering Alkire Foster-Oriented Quantification in Measuring Multidimensional Poverty Indicators by Using Intelligent Adaptive Neural Fuzzy Inference Systems	East & South Asia	Single	Developing	Education; Living standard; Health ; Monetary	No	Yes	No	Yes	Yes	No	Yes	No	No
Scopus	Zandia et al.	2019	Zoning and spatial analysis of poverty in urban areas (Case Study: Sabzevar City-Iran)	Middle East & North Africa	Single	Developing	Socio-cultural; Economic; Access to urban services	Yes	Unclear	Yes	Yes	No	No	Yes	No	No
